# Supplementary material
Source: Research Square preprint supplement (doi:10.21203/rs.3.rs-9587815/v1)
Supplement: Supplementary file 1 [file 24105a04d2f2e7b7a06ef5ff.docx]

Supplementary tables (1), (2) and (3).

**Table 1.** VITEK 2 system biochemical results of *E. coli.*

**
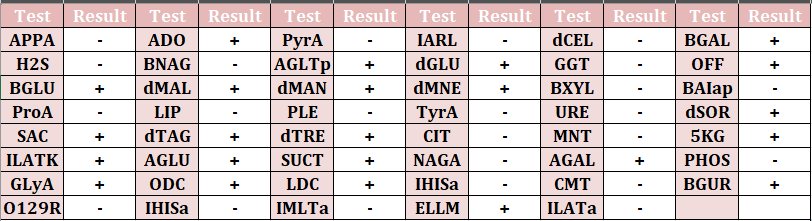
**

**Table 2.** VITEK 2 system biochemical results of *klebsiella pneumonia.*

**
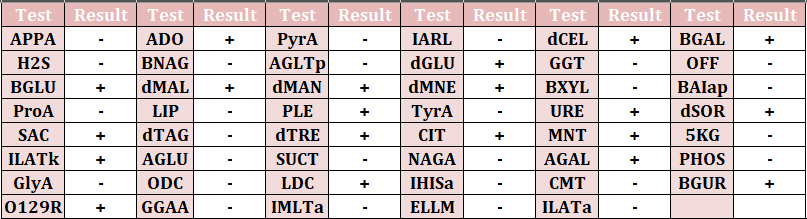
**

**Table 3.** VITEK 2 system biochemical results of *Staphylococcus haemolyticus.*

**
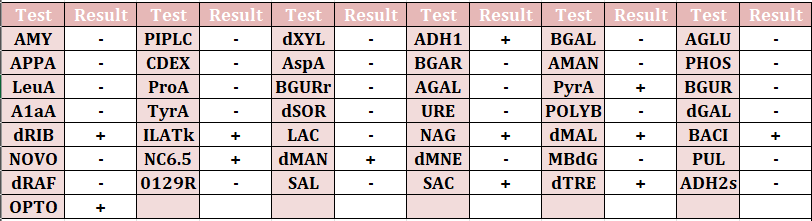
**


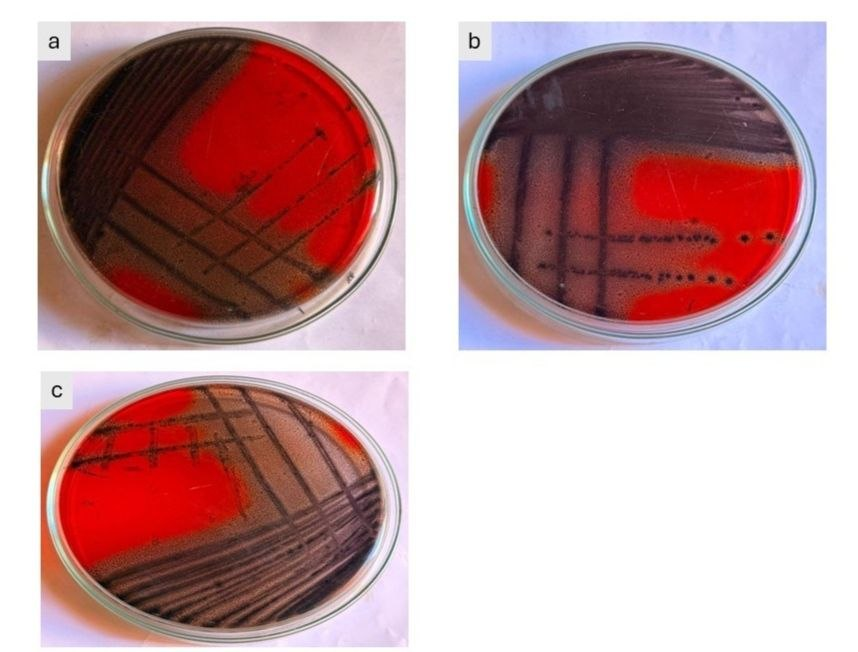


Fig 1. Biofilm formation by a) *E. coli b) klebsiella pneumonia c) Staphylococcus haemolyticus*
